# Supplementary material for: TAMSAT-ALERT v1: A new framework for agricultural decision support
Source: Copernicus journal article supplement (doi:10.5194/gmd-2017-316), 2018-02-06
Supplement: Supplementary file 1 [file gmd-2017-316-supplement.zip]

# TAMSAT-ALERT v1: A new framework for agricultural decision support (Supplementary information)

Dagmawi Asfaw<sup>1</sup>, Emily Black<sup>1</sup>, Matt Brown<sup>2</sup>, Kathryn Jane Nicklin<sup>3</sup>, Frederick Out-Larbi<sup>4</sup>, Ewan Pinnington<sup>1</sup>, Andrew Challinor<sup>3</sup>, Ross Maidment<sup>1</sup>, Tristan Quaife<sup>1</sup>

<sup>1</sup>Department of Meteorology, University of Reading, Reading, UK

<sup>2</sup>Department of Atmospheric, Oceanic and Planetary Physics, University of Oxford, Oxford, UK

<sup>3</sup>School of Earth and Environment, University of Leeds, Leeds, UK

<sup>4</sup>Ghana Meteorological Agency, Accra, Ghana

**Table S1. GLAM–maize parameter values used for the simulation of maize yield in Ghana**

| Parameter                            | Explanation                                                    | Value                               | Reference                                         |
|--------------------------------------|----------------------------------------------------------------|-------------------------------------|---------------------------------------------------|
| <b>Leaves</b>                        |                                                                |                                     |                                                   |
| DLDTMX                               | Maximum daily increase in LAI                                  | 0.1                                 | (Watson et al., 2015)                             |
| MASPA                                | Minimum daily increase in senesced LAI during leaf senescence. | 0.03                                | (Bergamaschi et al., 2013)                        |
| SWF_THRESH                           | Critical value of soil water stress factor for leaves          | 0.7                                 | (Bergamaschi et al., 2013)                        |
| NDSLAI                               | Specific Leaf Area control                                     | 5 days                              | (Challinor and Wheeler, 2008)                     |
| SLA_INI                              | Specific leaf area control (see Challinor and Wheeler 2008)    | 350 cm <sup>2</sup> g <sup>-1</sup> | (Ashraf and Hafeez , 2004)                        |
| MAX_ISTG_SLA                         | Max development stage for SLA control                          | 2 (until flowering)                 |                                                   |
| <b>Evaporation and transpiration</b> |                                                                |                                     |                                                   |
| ALBEDO                               | Albedo                                                         | 0.25                                | (Oguntunde and van de Giesen, 2004)               |
| CRIT_LAI_T                           | LAI below which transpiration is physiologically limited       | 2.7                                 | (Al-Kaisi et al., 1989; Bergamaschi et al., 2013) |
| P_TRANS_MAX                          | Max value of potential transpiration                           | 0.73 cm day <sup>-1</sup>           | (Al-Kaisi et al., 1989)                           |
| VPD_CTE                              | Used to calculate vapour pressure deficit                      | 0.7                                 | (Tanner and Sinclair, 1983)                       |
| VPD_REF                              | Used to calculate Priestly–Taylor coefficient                  | 1kPa                                | (Steiner et al., 1991)                            |
| SHF_CTE                              | Used to calculate soil heat flux                               | 0.4                                 | (Choudhury et al., 1987)                          |
| EXTC                                 | Extinction coefficient                                         | 0.5                                 | (Bergamaschi et al., 2013)                        |

|                          |                                                                             |                                      |                                                        |
|--------------------------|-----------------------------------------------------------------------------|--------------------------------------|--------------------------------------------------------|
| <b>Soil and roots</b>    |                                                                             |                                      |                                                        |
| RLL                      | Lower limit of volumetric soil water ( $\text{m}^3 \text{m}^{-3}$ )         | $0.083 \text{ m}^3 \text{m}^{-3}$    |                                                        |
| DUL                      | Drained upper limit of volumetric soil water ( $\text{m}^3 \text{m}^{-3}$ ) | $0.195 \text{ m}^3 \text{m}^{-3}$    |                                                        |
| SAT                      | Saturated volumetric soil water ( $\text{m}^3 \text{m}^{-3}$ )              | $0.409 \text{ m}^3 \text{m}^{-3}$    |                                                        |
| ASWS                     | Initial soil water (fraction of water holding capacity)                     | 0                                    |                                                        |
| NWBDAYS                  | Number of days water balance is run before start of planting window         | 30 days                              |                                                        |
| NSL                      | Number of soil layers                                                       | 25                                   | (Challinor et al., 2004)                               |
| ZSMAX                    | Maximum rooting depth                                                       | 150 cm                               |                                                        |
| RKCTE                    | Used to calculate saturated hydraulic conductivity of the soil              | $75 \text{ cm day}^{-1}$             | (Suleiman and Ritchie, 2001)                           |
| UPDIFC                   | Uptake diffusion coefficient                                                | $0.25 \text{ cm}^2 \text{day}^{-1}$  | (Jamieson and Ewert, 1999; Robertson and Fukai, 1994). |
| EFV                      | Extraction front velocity                                                   | $2 \text{ cm day}^{-1}$              | (Dardanelli et al., 1997; Bergamashi et al., 2013)     |
| DLDLAI                   | Increase in root length density at surface with LAI                         | $1 \text{ cm cm}^{-3}$               | (Bergamaschi et al., 2013)                             |
| RLVEF                    | Root length density at the extraction front                                 | $0.3 \text{ cm cm}^{-3}$             | (Watson et al., 2015)                                  |
| <b>Biomass and yield</b> |                                                                             |                                      |                                                        |
| TE                       | Transpiration efficiency                                                    | 7 Pa (1994–2006)<br>8 Pa (2007–2014) | (Walker, 1986; Adamtey et al., 2010)                   |
| TEN_MAX                  | Max transpiration efficiency                                                | $10 \text{ g kg}^{-1}$               | (Walker, 1986; Adamtey et al., 2010)                   |
| RUE                      | Radiation Use Efficiency                                                    | $3.4 \text{ g MJ}^{-1}$              | (Kiniry et al., 1989; Lindquist et al. , 2005)         |
| DHDT                     | Maximum daily increase in harvest index                                     | $0.011 \text{ day}^{-1}$             | (Birch et al., 1999)                                   |
| MAX_HI_MAIZE             | Maximum harvest index for maize                                             | 0.6                                  | (Hay and Gilbert, 2001)                                |
| <b>Development</b>       |                                                                             |                                      |                                                        |
| FSWSOW                   | Fractional soil moisture for intelligent planting and emergence             | 0.5                                  | (Challinor et al., 2004)                               |
| IEMDAY                   | Number of days from planting to emergence                                   | 6 days                               | (Ashagre et al., 2014)                                 |

|                           |                                                                 |                            |                                            |
|---------------------------|-----------------------------------------------------------------|----------------------------|--------------------------------------------|
| I_TTCALC                  | Shape of function to calculate thermal time                     | 1 (flat top)               | (Keating et al., 1992)                     |
| TBMAI                     | Base temperature for maize                                      | 10 °C                      | (Sanchez et al., 2014)                     |
| TOMAI                     | Optimum temperature for maize                                   | 30 °C                      | (Sanchez et al., 2014)                     |
| TMMAI                     | Maximum temperature for maize                                   | 40 °C                      | (Sanchez et al., 2014)                     |
| I_PHEN                    | Complex (I_PHEN=0) or simple (I_PHEN=1) simulation of phenology | 1                          |                                            |
| TLIMFLW                   | Thermal time from emergence to silking                          | 680 °C days                |                                            |
| TLIMPFL                   | Thermal time from silking to start of grain filling.            | 145 °C days                | (Tumbo et al., 2010)                       |
| TLIMGFP                   | Thermal time from start of grain filling to maturity            | 750 °C days                |                                            |
| <b>Optional processes</b> |                                                                 |                            |                                            |
| TETRS                     | Switch for temperature dependence of TE and RUE                 | 1(on)                      |                                            |
| TETR1                     | Temperature above which TE and RUE begin linear reduction       | 35 °C                      | (Yang et al., 2004; Carberry et al., 1989) |
| TETR2                     | Temperature above which TE and RUE are zero                     | 47 °C                      | (Yang et al., 2004; Carberry et al., 1989) |
| TETR3                     | Temperature below which TE and RUE are zero                     | 7 °C                       | (Yang et al., 2004; Carberry et al., 1989) |
| TETR4                     | Temperature below which TE and RUE begin linear reduction       | 18 °C                      | (Yang et al., 2004; Carberry et al., 1989) |
| HTS                       | Switch for high temperature stress around flowering             | 0(off)                     | (Gourdji et al., 2013)                     |
| TDS                       | Switch for terminal drought stress (TDS)                        | 1(on)                      |                                            |
| HIMIN                     | Minimum harvest index for TDS to occur                          | 0.25                       | (Challinor et al., 2009)                   |
| SWC_FAC                   | Fraction of water holding capacity below which TDS occurs       | 0.05                       | (Challinor et al., 2009)                   |
| MIN_ISTG_TDS              | Minimum ISTG for TDS to occur.                                  | 4 (start of grain filling) |                                            |
| NMAXTDS                   | Number of days of TDS needed for the crop to be harvested.      | 8 days                     | (Jones and Thornton, 2003)                 |
| IEMER                     | Switch for intelligent emergence                                | -1 (off)                   |                                            |

|        |                                                         |          |                        |
|--------|---------------------------------------------------------|----------|------------------------|
| TRKILL | Switch for lethal temperature parameterisation          | -1 (off) |                        |
| WS     | Switch for water stress around flowering                | 0 (off)  |                        |
| TRLAI  | Switch for temperature dependence of LAI growth         | 1 (on)   |                        |
| TRLAIB | Base temperature below which leaf growth does not occur | 7.3 °C   | (Sanchez et al., 2014) |
| TRLAIO | Optimum temperature for leaf growth                     | 31.1 °C  | (Sanchez et al., 2014) |
| TRLAIM | Maximum temperature for leaf growth                     | 41.3 °C  | (Sanchez et al., 2014) |

## References

- Adamtey, N., Cofie, O., Ofosu-Budu, K. G., Ofosu-Anim, J., Laryea, K. B., and Forster, D.: Effect of N-enriched co-compost on transpiration efficiency and water-use efficiency of maize (*Zea mays* L.) under controlled irrigation, *Agricultural Water Management*, 97, 995–1005, doi:10.1016/j.agwat.2010.02.004, 2010.
- Al-Kaisi, M., Brun, L. J., and Enz, J. W.: Transpiration and evapotranspiration from maize as related to leaf area index, *Agricultural and Forest Meteorology*, 48, 111–116, doi:10.1016/0168-1923(89)90010-5, 1989.
- Ashagre, H., Hamza, I. A., Tesfaye, B., Derebachew, D., and Ayana, B.: Emergence and Seedling Growth of Corn (*Zea mays* L.) as Influenced by Irrigation Schedules on Vertisol, *International Research Journal of Plant Science*, 5, 17–22, doi:http://dx.doi.org/10.14303/irjps.2013.061, 2014.
- Ashraf, M. and Hafeez, M.: Thermotolerance of pearl millet and maize at early growth stages: Growth and nutrient relations, *Biologia Plantarum*, 48, 81–86, doi:10.1023/B:BIOP.0000024279.44013.61, 2004.
- Bergamaschi, H., da Costa, S. M. S., Wheeler, T. R., and Challinor, A. J.: Simulating maize yield in sub-tropical conditions of southern Brazil using Glam model, *Pesquisa Agropecuaria Brasileira*, 48, 132–140, doi:10.1590/S0100-204X2013000200002, 2013.
- Birch, C. J., Hammer, G. L., and Rickert, K. G.: Dry matter accumulation and distribution in five cultivars of maize (*Zea mays*): Relationships and procedures for use in crop modelling, *Australian Journal of Agricultural Research*, 50, 513–527, doi:10.17700/jai.2015.6.1, 1999.
- Carberry, P. S., Muchow, R. C., and McCown, R. L.: Testing the CERES-Maize simulation model in a semi-arid tropical environment, *Field Crops Research*, 20, 297–315, doi:10.1016/0378-4290(89)90072-5, 1989.
- Challinor, A. J. and Wheeler, T. R.: Use of a crop model ensemble to quantify CO<sub>2</sub> stimulation of water-stressed and well watered crops, *Agricultural and Forest Meteorology*, 148, 1062–1077, doi:10.1016/j.agrformet.2008.02.006, 2008.
- Challinor, A. J., Wheeler, T. R., Craufurd, P. Q., Slingo, J. M., and Grimes, D. I. F.: Design and optimisation of a large-area process-based model for annual crops, *Agricultural and Forest Meteorology*, 124, 99–120, doi:10.1016/j.agrformet.2004.01.002, 2004.
- Challinor, A. J., Wheeler, T., Hemming, D., and Upadhyaya, H. D.: Ensemble yield simulations: Crop and climate uncertainties, sensitivity to temperature and genotypic adaptation to climate change, *Climate Research*, 38, 117–127, doi:10.3354/cr00779, 2009.
- Choudhury, B. J., Idso, S. B., and Reginato, R. J.: Analysis of an empirical model for soil heat flux under a growing wheat crop for estimating evaporation by an infrared-temperature based energy balance equation, *Agricultural and Forest Meteorology*, 39, 283–297, doi:10.1016/0168-1923(87)90021-9, 1987.
- Dardanelli, J. L., Bachmeier, O. A., Sereno, R., and Gil, R.: Rooting depth and soil water extraction patterns of different crops in a silty loam haplustoll, *Field Crops Research*, 54, 29–38, doi:10.1016/S0378-4290(97)00017-8, 1997.
- Gourdji, S. M., Sibley, A. M., and Lobell, D. B.: Global crop exposure to critical high temperatures in the reproductive period: Historical trends and future projections, *Environmental Research Letters*, 8, 0–10, doi:10.1088/1748-9326/8/2/024041, 2013.
- Hay, R. and Gilbert, R.: Variation in the harvest index of tropical maize: evaluation of recent evidence from Mexico and Malawi, *Annals of Applied Biology*, 138, 103–109, doi:10.1111/j.1744-7348.2001.tb00090.x, 2001.
- Jamieson, P. D. and Ewert, F.: The role of roots in controlling soil water extraction during drought: An analysis by simulation, *Field Crops Research*, 60, 267–280, doi:10.1016/S0378-4290(98)00144-0, 1999.
- Jones, P. G. and Thornton, P. K.: The potential impacts of climate change on maize production in Africa and Latin America in 2055, *Global Environmental Change*, 13, 51–59, doi:10.1016/S0959-3780(02)00090-0, 2003.
- Keating, B. A., Wafula, B. M., and Watiki, J. M.: Development of a modelling capability for maize in semi-arid eastern Kenya, in: *A Search for Strategies for Sustainable Dryland Cropping in Semi-arid Eastern Kenya*, edited by Probert, M. E., 41, pp. 26–32, ACIAR Proceedings No 41, Nairobi, Kenya, URL [http://aciarc.gov.au/files/node/2274/sustainable{\\\_}dryland{\\\_}cropping{\\\_}in{\\\_}semi{\\\_}arid{\\\_}eastern{\\\_}{\\\_}{\\\_}1109.pdf{\#}page=11](http://aciarc.gov.au/files/node/2274/sustainable{\_}dryland{\_}cropping{\_}in{\_}semi{\_}arid{\_}eastern{\_}{\_}{\_}1109.pdf{\#}page=11), 1992.
- Kiniry, J. R., Jones, C. A., O'toole, J. C., Blanchet, R., Cabelguenne, M., and Spanel, D. A.: Radiation-use efficiency in biomass accumulation prior to grain-filling for five grain-crop species, *Field Crops Research*, 20, 51–64, doi:10.1016/0378-4290(89)90023-3, 1989.

- Lindquist, J. L., Arkebauer, T. J., Walters, D. T., Cassman, K. G., and Dobermann, A.: Maize Radiation Use Efficiency under Optimal Growth Conditions, *Agronomy Journal*, 97, 72–78, 2005.
- Oguntunde, P. G. and Van De Giesen, N.: Crop growth and development effects on surface albedo for maize and cowpea fields in Ghana, West Africa, *International Journal of Biometeorology*, 49, 106–112, doi:10.1007/s00484-004-0216-4, 2004.
- Robertson, M. J. and Fukai, S.: Comparison of water extraction models for grain sorghum under continuous soil drying, *Field Crops Research*, 36, 145–160, doi:10.1016/0378-4290(94)90063-9, 1994.
- Sanchez, B., Rasmussen, A., and Porter, J. R.: Temperatures and the growth and development of maize and rice: A review, *Global Change Biology*, 20, 408–417, doi:10.1111/gcb.12389, 2014.
- Steiner, J., Howell, T., and Schneider, A.: Lysimetric evaluation of daily potential evapotranspiration models for grain sorghum, *Agronomy Journal*, 83, 240–247, doi:10.2134/agronj1991.00021962008300010055x, 1991.
- Suleiman, a. and Ritchie, J. T.: Estimating saturated hydraulic conductivity from soil porosity, *Transactions of the ASAE*, 44, 235–239, doi:10.13031/2013.4683, 2001.
- Tanner, C. B. and Sinclair, T. R.: Efficient Water Use in Crop Production: Research or Re-Search?, in: *Limitations to Efficient Water Use in Crop Production*, edited by Tanner, C. and Sinclair, T. R., pp. 1–27, American Society of Agronomy, Crop Science Society of America and Soil Science Society of America, Madison, Wisconsin, 1983.
- Tumbo, S. D., Rwehumbiza, F. B., Kahimba, F. C., Enfors, E., and Henry, F.: Agronomic Management Strategies for Adaptation to the Current Climate Variability: The Case of North-Eastern Tanzania, <http://hdl.handle.net/10625/46075>, 2010.
- Walker, G. K.: Transpiration efficiency of field-grown maize, *Field Crops Research*, 14, 29–38, doi:10.1016/0378-4290(86)90044-4, 1986.
- Watson, J., Challinor, A. J., Fricker, T. E., and Ferro, C. A.: Comparing the effects of calibration and climate errors on a statistical crop model and a process-based crop model, *Climatic Change*, 132, 93–109, doi:10.1007/s10584-014-1264-3, 2015.
- Yang, H. S., Dobermann, A., Lindquist, J. L., Walters, D. T., Arkebauer, T. J., and Cassman, K. G.: Hybrid-maize - A maize simulation model that combines two crop modeling approaches, *Field Crops Research*, 87, 131–154, doi:10.1016/j.fcr.2003.10.003, 2004.
