# Supplementary material for: TAMSAT-ALERT v1: A new framework for agricultural decision support
Source: Copernicus journal article supplement (doi:10.5194/gmd-2017-316), 2018-02-06
Supplement: Supplementary file 2 [file gmd-2017-316-supplement.zip]

Archive with 2 entries (2 files):
- supplementary_information/supplementary_information.pdf
- supplementary_information/TAMSAT-ALERT_user_guide.pdf
